# Supplementary material for: Eddy-covariance with slow-response greenhouse gas analyser on tall towers: bridging atmospheric and ecosystem greenhouse gases networks
Source: Copernicus journal article supplement (doi:10.5194/amt-2024-71), 2024-05-13
Supplement: Supplementary file 1 [file amt-2024-71-supplement.pdf]

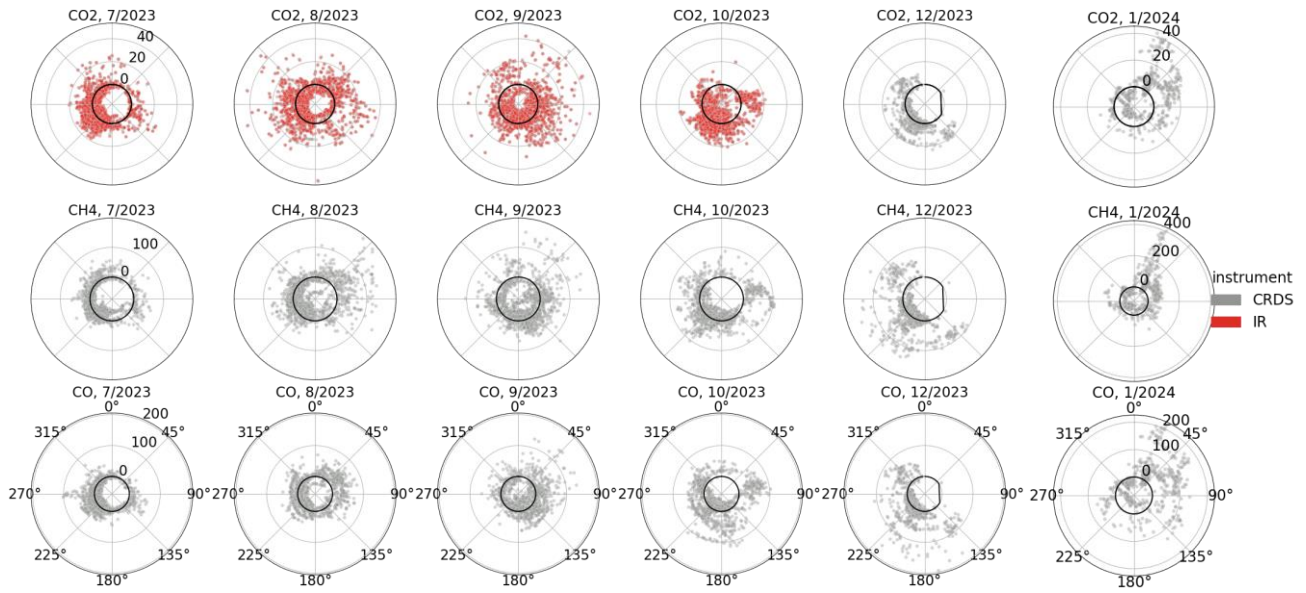

**Figure S 1. Concentration by wind direction. Values are difference from the monthly median (black line is 0). Extreme values in the left and right 0.1% tails were removed. Note that January have a different scale**

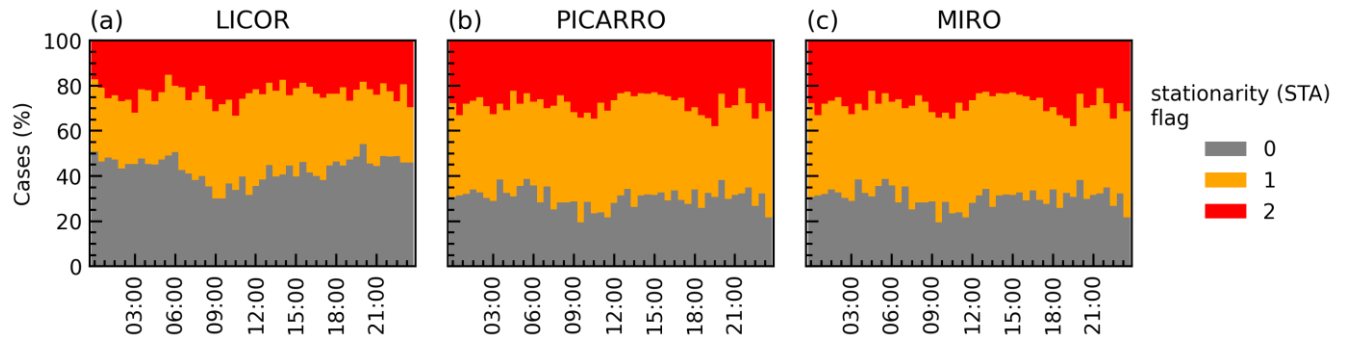

**Figure S 2. Quality control flags for CO<sub>2</sub> flux stationarity for the three gas analysers. Flags follow 0-1-2 system for high, medium and low-quality.**

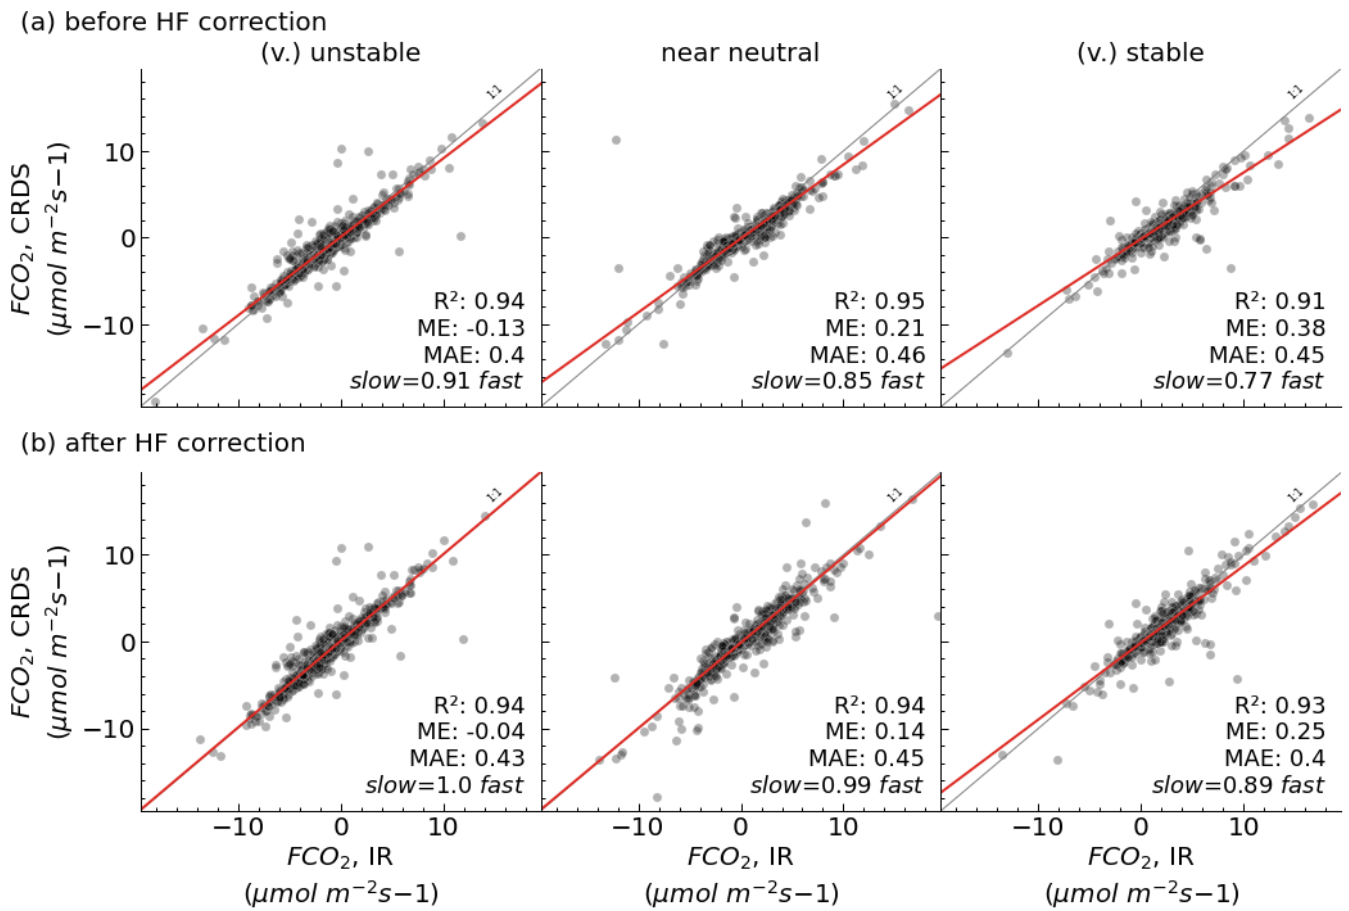

10 **Figure S 3. Comparison of CO<sub>2</sub> flux using IR (LI-7200) and CRDS (PICARRO G2401) per stability condition. Dots are observations, red line is true linear relation and grey line is 1:1 line. The correlation coefficient ( $R^2$ ), the mean error (ME,  $\mu\text{mol m}^{-2}\text{s}^{-1}$ ), the mean absolute error (MAE,  $\mu\text{mol m}^{-2}\text{s}^{-1}$ ) and the linear fit.**

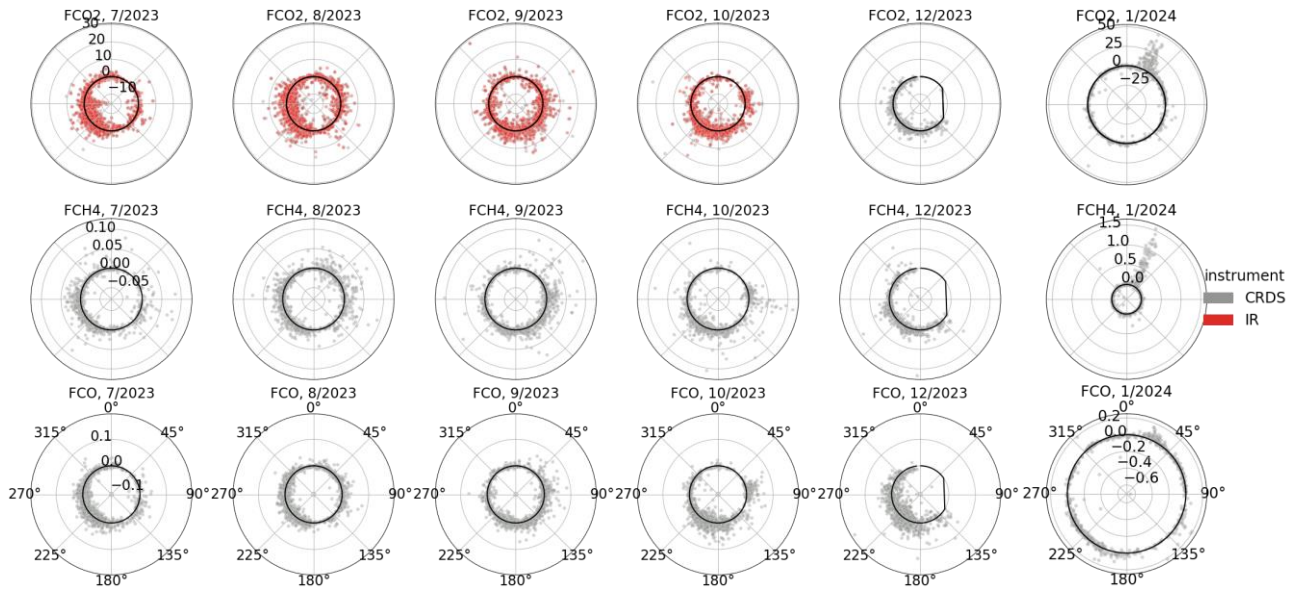

**Figure S 4. Turbulent fluxes by wind direction. Values are difference from the monthly media, 0.1% extreme values dropped. Note that January have a different scale.**

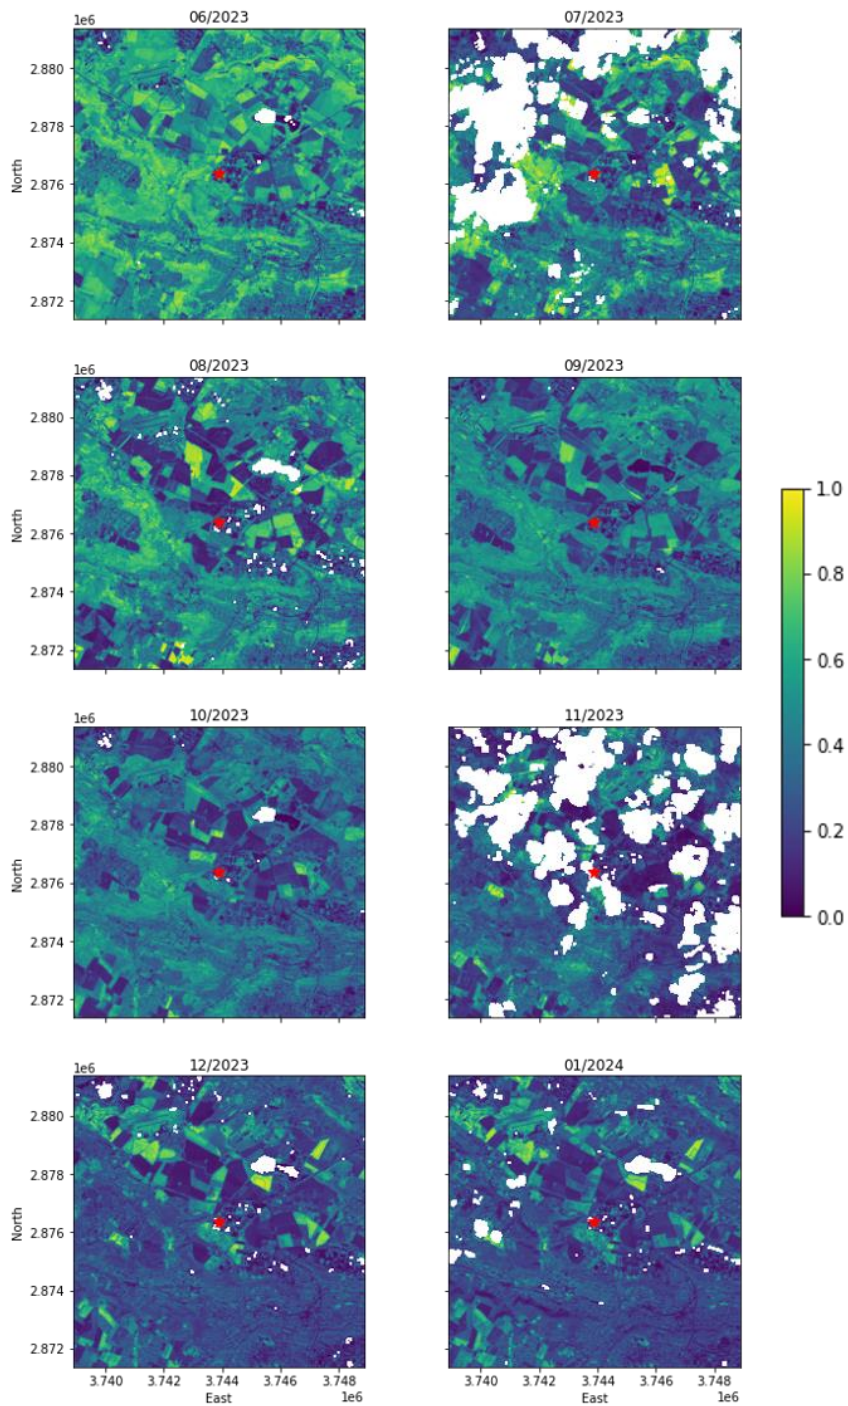

15

Figure S 5. Monthly averaged EVI 10x10 km grid centred in Saclay tower (red star). Pixels with no data are represented in white.

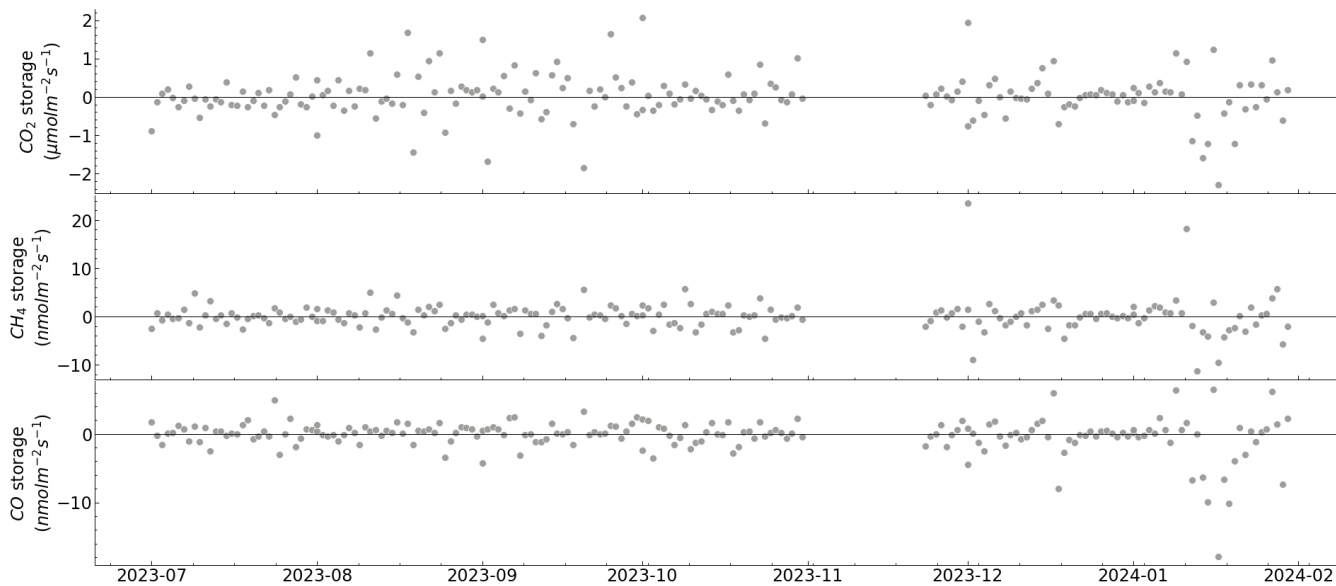

**Figure S 6.** Daily storage fluxes of CO<sub>2</sub>, CH<sub>4</sub> and CO using measurements of a single CRDS (PICARRO G2401) gas analyser at 3 levels (15, 60, 100 m). Daily storage flux should be zero in ideal conditions since stocking and destocking should compensate each other.

20

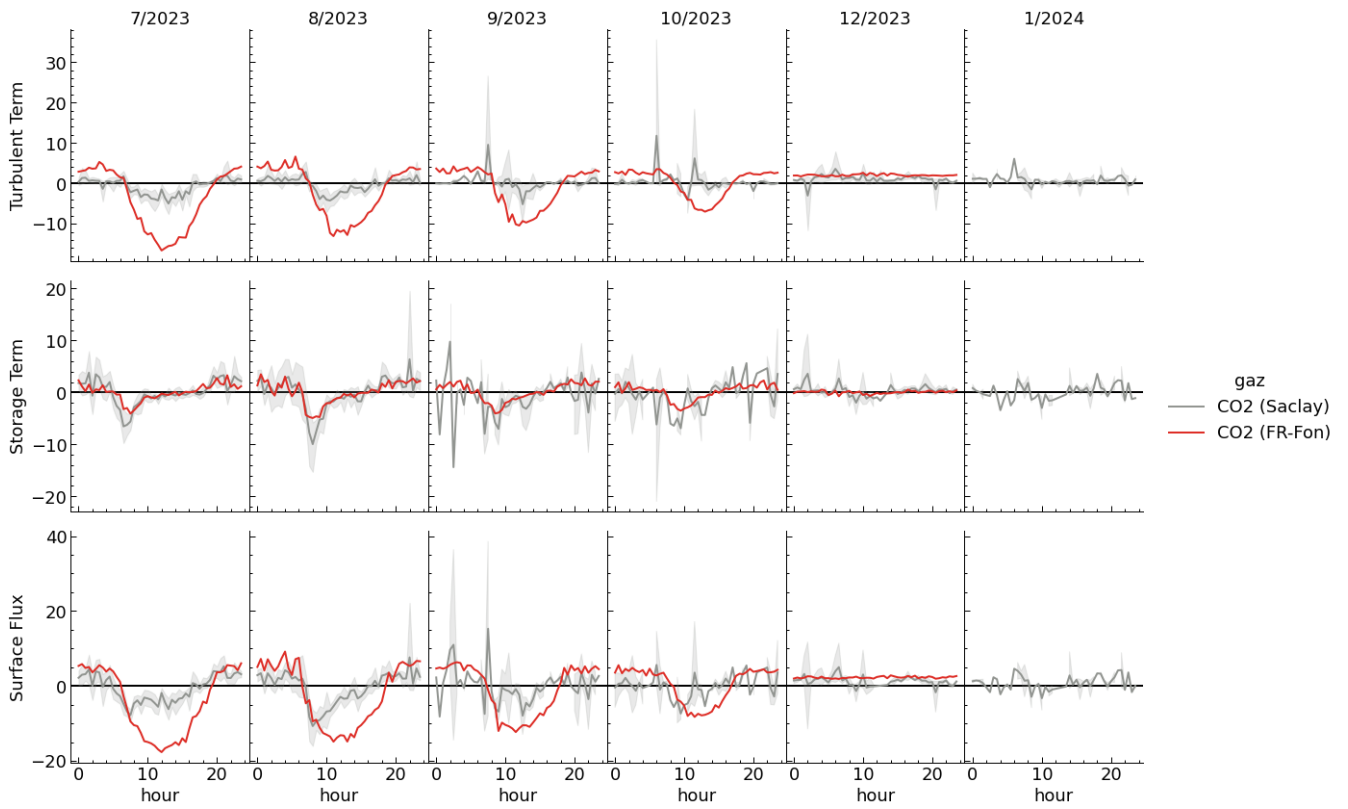

**Figure S 7. Comparison with forest site (FR-Fon). Data available at ICOS Data Portal ([https://meta.icos-cp.eu/objects/1Cyv5rk\\_qnaafxXx1skb2mV](https://meta.icos-cp.eu/objects/1Cyv5rk_qnaafxXx1skb2mV)).**
